# Supplementary material for: The hidden malaria: Misidentification of Plasmodium malariae and Plasmodium ovale in low-transmission setting targeted for elimination in Ethiopia
Source: Research Square preprint supplement (doi:10.21203/rs.3.rs-9131091/v1), 2026-04-09
Supplement: Supplementary file 1 [file c26f6c94229f9e436c861c0e.docx]

# Supplementary

**Table S1**: Primer and probe sequences used in this study

| **Species-specific qPCRs (target: conserved regions in 18S rRNA)** | | |
| --- | --- | --- |
| **Species** | **Primer** | **Sequence (5’ -> 3’)** |
| *P. falciparum* | VarATS-F | CCCATACACAACCAAYTGGA |
| VarATS-R | TTCGCACATATCTCTATGTCTATCT |
| Pf-var-probe (FAM) | TRTTCCATAAATGGT |
| *P. falciparum* | Pf-1 | TATTGCTTTTGAGAGGTTTTGTTACTTTG |
| Pf-2 | ACCTCTGACATCTGAATACGAATGC |
| Pf-probe (FAM-BHQ) | ACGGGTAGTCATGATTGAGTT |
| *P. vivax* | Pv-1 | CGCTTCTAGCTTAATCCACATAACTG |
| Pv-2 | AATTTACTCAAAGTAACAAGGACTTCCAAG |
| Pv-probe (VIC-MGB) | CGCATTTTGCTATTATGT |
| *P. ovale* | Po-1 | AACCCAAAGACTTTGATTTCTCATAA |
| Po-2 | CCGACTAGGTTTTGGATGAAAGATTTTT |
| po-probe (NED-MGB) | CGAAAGGAATTTTCTTATT |
| *P. malariae* | Pm-1 | AGTTAAGGGAGTGAAGACGATCAGA |
| Pm-2 | CAACCCAAAGACTTTGATTTCTCATAA |
| Pm-probe (VIC-MGB) | ATGAGTGTTTCTTTTAGATAGC |

**Table S2.** Comparison of the performance of RDTs and microscopy for malaria diagnosis in Arjo-Didessa sugar development area, southwest Ethiopia, 2019-2021

| **Methods** | | **Microscopy** | | | |
| --- | --- | --- | --- | --- | --- |
| ***Pv*, n(%)** | ***Pf*, n(%)** | ***Pf+Pv*, n(%)** | **Total** |
|  | **Negative** | 14 (100) | 0 | 0 | 14 |
| **RDTs** | ***Pv*** | 145 (98.0) | 1 (0.7) | 2 (1.4) | 148 |
|  | **Total** | 159 (98.1) | 1 (0.6) | 2 (1.2) | 162 |
